# Supplementary material
Source: PubMed Central journal article supplement (PMC6050125)

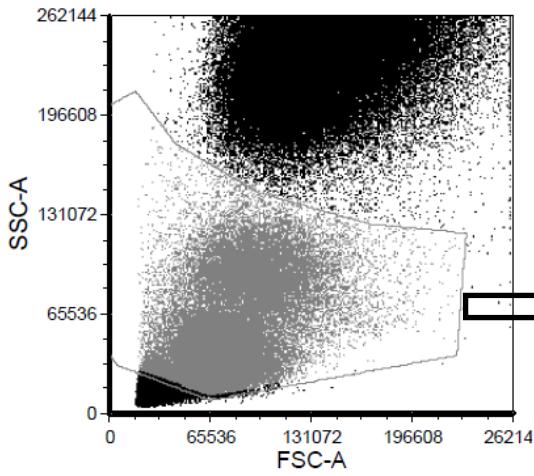

**CD56**  
APC-A

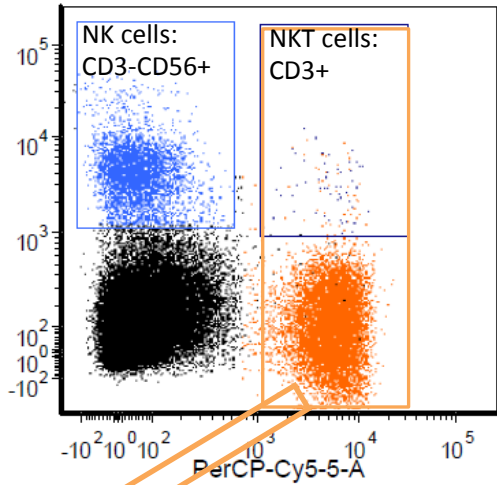

**CD3**

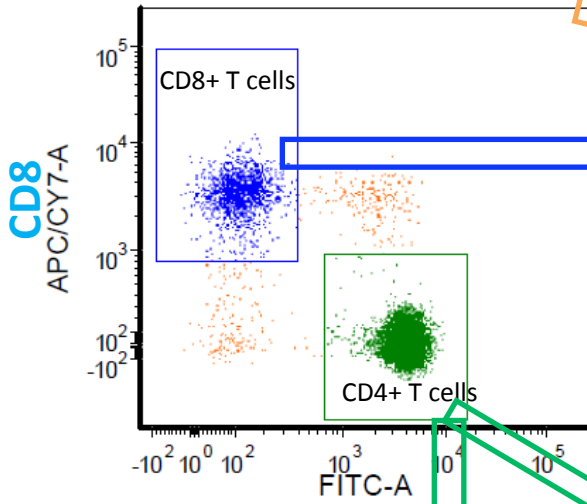

**CD8**  
APC/CY7-A

**CD4**

**CD25**  
PE-A

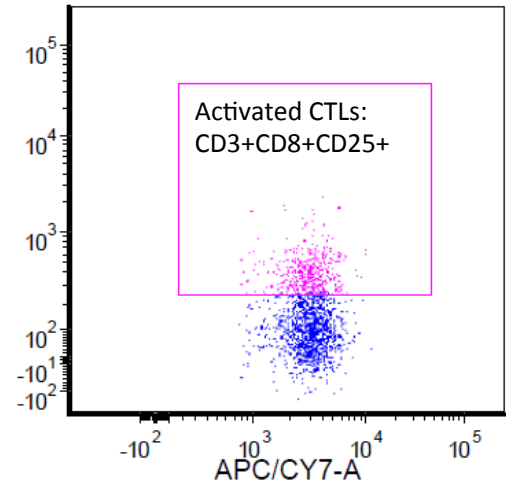

**CD8**

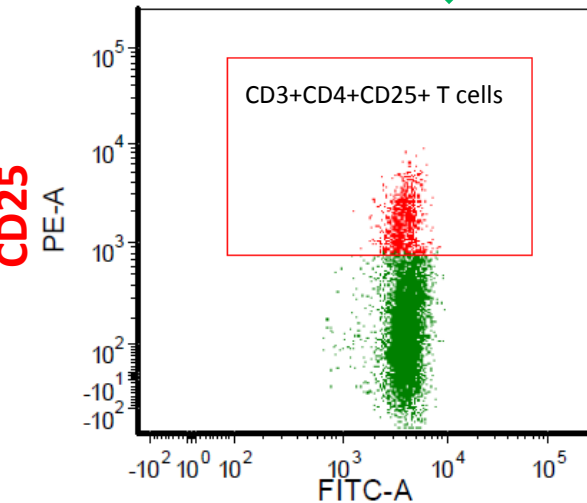

**CD25**  
PE-A

**CD4**

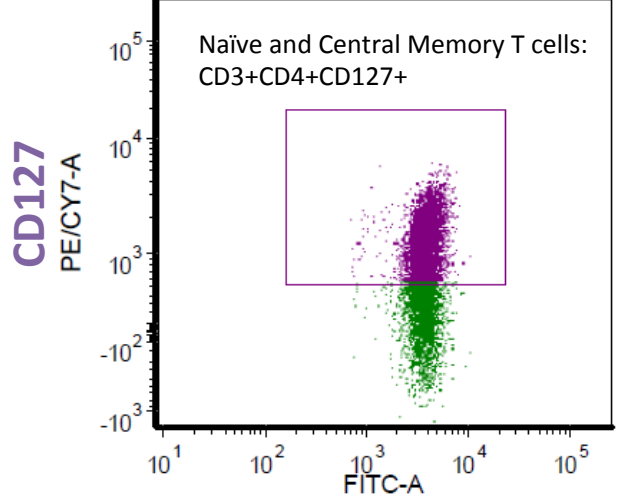

**CD127**  
PE/CY7-A

**CD4**

Supplement: NIHMS961006-supplement-1.pdf [file NIHMS961006-supplement-1.pdf]

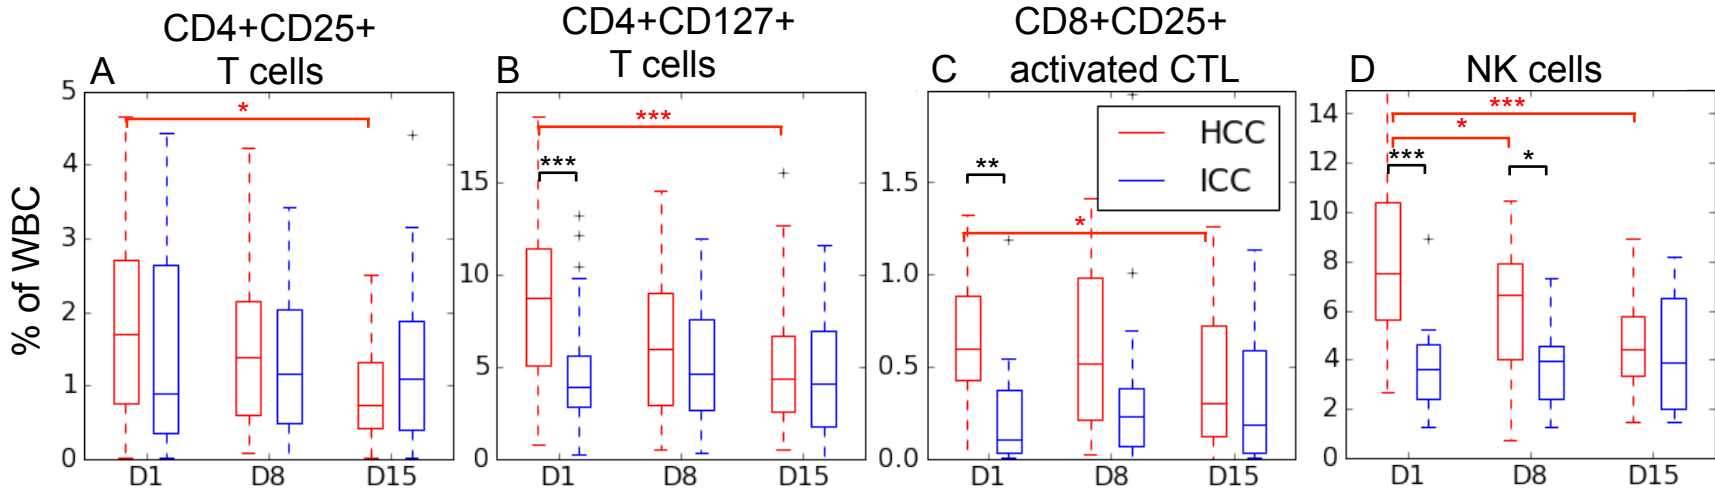

Supplement: NIHMS961006-supplement-2.pdf [file NIHMS961006-supplement-2.pdf]
